# Supplementary material for: Performance comparison of QuantiFERON-TB Gold In-Tube and QuantiFERON-TB Gold Plus in detecting Mycobacterium tuberculosis infection among HIV patients in China
Source: PeerJ. 2025 Mar 31;13:e19195. doi: 10.7717/peerj.19195 (PMC11967438; doi:10.7717/peerj.19195)
Supplement: Supplemental Information 2 [file peerj-13-19195-s002.xlsx]

## Sheet: Sheet1
				QFT-GIT								QFT-Plus
treatment therapy	CD4	CD4≥500	Run Number	Run Date	Valid Test	3Nil	3TB Ag	3Mitogen	3TB Ag-Nil	3Mitogen-Nil	3Result	4Nil	4TB1	4TB2	4Mitogen	4TB1-Nil	4TB2-Nil	4Mitogen-Nil	result of TB1	result of TB2	Result of QFT-Plus	age	Sex	TB Ag-Nil	result of QFT	smoking	drinking	diameter of TST	TST≥5	TST≥10	diameter of EC	result of EC	BCG
3HP	180	0	1	14/4/2023	Yes	0.03	0.17	10	0.14	10	0	0.04	0.17	0.16	10	0.13	0.12	10	0	0	0	50	1	0.35	1	1	1	1	0	0	1	0	0
	518	1	1	14/4/2023	Yes	0.06	0.06	10	0	10	0	0.07	0.09	0.09	10	0.02	0.02	10	0	0	0	28	1	-0.07	0	1	1	0	0	0	0	0	0
	423	0	1	14/4/2023	Yes	0.24	0.22	10	-0.02	10	0	0.19	0.4	0.26	10	0.21	0.07	10	0	0	0	45	1	-0.29	0	0	1	0	0	0	0	0	1
	261	0	1	14/4/2023	Yes	0.05	0.07	1.05	0.02	1	0	0.08	0.1	0.12	1.16	0.02	0.04	1.08	0	0	0	47	1	10	1	1	1	0	0	0	0	0	0
	310	0	1	14/4/2023	Yes	0.14	0.12	8.75	-0.02	8.61	0	0.14	0.16	0.15	10	0.02	0.01	10	0	0	0	33	1	-0.01	0	0	1	0	0	0	0	0	0
	432	0	1	14/4/2023	Yes	0.1	0.06	10	-0.04	10	0	0.13	0.12	0.11	10	-0.01	-0.02	10	0	0	0	43	1	0	0	1	1	0	0	0	0	0	1
	241	0	1	14/4/2023	Yes	0.03	0.05	5.15	0.02	5.12	0	0.08	0.12	0.09	4.99	0.04	0.01	4.91	0	0	0	43	1	0.11	0	1	1	0	0	0	0	0	1
3HP	414	0	1	14/4/2023	Yes	0.1	7.73	10	7.63	10	1	0.11	3.97	3.44	10	3.86	3.33	10	1	1	1	47	1	10	1	1	1	25	1	1	10	1	0
	360	0	1	14/4/2023	Yes	0.07	0.06	8.95	-0.01	8.88	0	0.08	0.1	0.08	10	0.02	0	10	0	0	0	43	1	-0.03	0	0	1	0	0	0	0	0	0
	492	0	1	14/4/2023	Yes	0.06	0.05	10	-0.01	10	0	0.15	0.17	0.16	10	0.02	0.01	10	0	0	0	31	1	0.17	0	1	1	0	0	0	0	0	0
Mycobacterium vaccae	1065	1	1	14/4/2023	Yes	0.12	0.1	10	-0.02	10	0	0.14	0.15	0.1	10	0.01	-0.04	10	0	0	0	43	1	-0.95	0	1	1	19	1	1	0	0	0
	197	0	1	14/4/2023	Yes	0.04	0.03	10	-0.01	10	0	0.27	0.12	0.04	10	-0.15	-0.23	10	0	0	0	56	1	0	0	1	0	0	0	0	0	0	0
	692	1	1	14/4/2023	Yes	0.4	0.39	10	-0.01	10	0	0.41	0.61	0.57	10	0.2	0.16	10	0	0	0	39	1	-0.03	0	1	1	0	0	0	0	0	1
	611	1	1	14/4/2023	Yes	0.05	0.04	10	-0.01	10	0	0.05	0.05	0.04	10	0	-0.01	10	0	0	0	43	1	-0.14	0	0	0	0	0	0	0	0	1
	147	0	1	14/4/2023	Yes	0.02	0.02	10	0	10	0	0.1	0.12	0.04	10	0.02	-0.06	10	0	0	0	48	1	0.03	0	1	1	0	0	0	0	0	1
	460	0	1	14/4/2023	Yes	0.07	0.07	10	0	10	0	0.09	0.09	0.11	10	0	0.02	10	0	0	0	37	1
3HP	750	1	1	14/4/2023	Yes	0.07	5.58	10	5.51	10	1	0.24	5.62	5.53	10	5.38	5.29	10	1	1	1	52	1	10	1	1	0	16.5	1	1	25	1	1
	691	1	1	14/4/2023	Yes	0.03	0.02	10	-0.01	10	0	0.06	0.06	0.05	10	0	-0.01	10	0	0	0	53	1	-0.13	0	1	1	0	0	0	0	0	0
	353	0	1	14/4/2023	Yes	0.08	0.06	10	-0.02	10	0	0.11	0.07	0.1	10	-0.04	-0.01	10	0	0	0	38	1	0	0	0	0	0	0	0	0	0	1
	330	0	1	14/4/2023	Yes	0.04	0.03	10	-0.01	10	0	0.07	0.05	0.05	10	-0.02	-0.02	10	0	0	0	34	1	-0.01	0	1	1	0	0	0	0	0	1
	670	1	1	14/4/2023	Yes	0.02	0.02	10	0	10	0	0.05	0.05	0.05	10	0	0	10	0	0	0	50	1	-0.02	0	1	1	0	0	0	0	0	1
	499	0	1	14/4/2023	Yes	0.15	0.09	10	-0.06	10	0	0.13	0.16	0.16	7.97	0.03	0.03	7.84	0	0	0	56	1	-0.01	0	1	1	0	0	0	0	0	1
	249	0	1	14/4/2023	Yes	0.03	0.04	10	0.01	10	0	0.06	0.05	0.05	10	-0.01	-0.01	10	0	0	0	36	1	0.02	0	0	1	0	0	0	0	0	1
	394	0	1	14/4/2023	Yes	0.03	0.02	8.89	-0.01	8.86	0	0.03	0.03	0.04	10	0	0.01	10	0	0	0	36	1	-0.01	0	0	1	0	0	0	0	0	0
	198	0	1	14/4/2023	Yes	0.08	0.06	10	-0.02	10	0	0.07	0.07	0.07	10	0	0	10	0	0	0	42	1	-0.07	0	0	0	0	0	0	0	0	1
	350	0	1	14/4/2023	Yes	0.03	0.02	10	-0.01	10	0	0.03	0.03	0.03	9.55	0	0	9.52	0	0	0	37	1	0	0	1	1	0	0	0	0	0	0
	392	0	1	14/4/2023	Yes	0.09	0.09	9.22	0	9.13	0	0.04	0.07	0.08	5.39	0.03	0.04	5.35	0	0	0	49	1	0.01	0	1	1	0	0	0	0	0	1
	81	0	1	14/4/2023	Yes	0.05	0.06	10	0.01	10	0	0.06	0.03	0.05	10	-0.03	-0.01	10	0	0	0	46	1	0.23	0	1	1	0	0	0	0	0	0
Mycobacterium vaccae	273	0	1	14/4/2023	Yes	0.05	7.84	10	7.79	10	1	0.29	5.56	5.22	10	5.27	4.93	10	1	1	1	33	1
	535	1	1	14/4/2023	Yes	0.83	0.54	10	-0.29	10	0	0.48	0.33	0.38	10	-0.15	-0.1	10	0	0	0	37	1
Mycobacterium vaccae	282	0	1	14/4/2023	Yes	0.19	0.13	10	-0.06	10	0	0.09	0.11	0.07	7.73	0.02	-0.02	7.64	0	0	0	35	1	-0.04	0	0	1	10	1	1	0	0	0
	421	0	1	14/4/2023	Yes	0.04	0.04	10	0	10	0	0.09	0.07	0.04	10	-0.02	-0.05	10	0	0	0	30	1	-0.11	0	1	1	0	0	0	0	0	1
3HP	176	0	1	14/4/2023	Yes	2.53	9.13	10	6.6	9.99	1	2.38	6.84	6.67	9.01	4.46	4.29	6.63	1	1	1	57	1	4.96	1	0	1	0	0	0	55	1	1
	506	1	1	14/4/2023	Yes	0.09	0.08	10	-0.01	10	0	0.18	0.03	0.05	10	-0.15	-0.13	10	0	0	0	36	1	-0.02	0	0	1	0	0	0	0	0	1
	409	0	1	14/4/2023	Yes	0.05	0.03	10	-0.02	10	0	0.03	0.07	0.18	10	0.04	0.15	10	0	0	0	31	1	0.07	0	1	1	0	0	0	0	0	1
	412	0	1	14/4/2023	Yes	0.04	0.03	6.49	-0.01	6.45	0	0.04	0.03	0.04	3.31	-0.01	0	3.27	0	0	0	30	1	0.01	0	1	1	0	0	0	0	0	1
Mycobacterium vaccae	288	0	1	14/4/2023	Yes	0.12	4.69	10	4.57	10	1	0.64	3.1	3.52	10	2.46	2.88	10	1	1	1	35	1
	252	0	1	14/4/2023	Yes	0.06	0.04	10	-0.02	10	0	0.03	0.03	0.03	10	0	0	10	0	0	0	34	1	-0.03	0	1	0	0	0	0	0	0	0
	352	0	1	14/4/2023	Yes	0.07	0.08	10	0.01	10	0	0.26	0	0.06	10	-0.26	-0.2	10	0	0	0	27	1	0.08	0	1	0	0	0	0	0	0	0
	386	0	1	14/4/2023	Yes	0.12	0.09	10	-0.03	10	0	0.07	0.06	0.05	10	-0.01	-0.02	10	0	0	0	41	1	0	0	1	0	0	0	0	0	0	1
	325	0	1	14/4/2023	Yes	0.03	0.35	10	0.32	10	0	0.09	0.2	0.28	9.68	0.11	0.19	9.59	0	0	0	40	1	6.28	1	1	1	0	0	0	0	0	1
Mycobacterium vaccae	314	0	1	14/4/2023	Yes	0.17	3.03	10	2.86	10	1	0.23	1.96	1.66	10	1.73	1.43	10	1	1	1	42	1	1.68	1	1	0	8.5	1	0	0	0	0
3HP	393	0	1	14/4/2023	Yes	0.03	0.84	10	0.81	10	1	0.04	0.41	0.39	9.53	0.37	0.35	9.49	1	1	1	39	1	0.28	0	1	1	15	1	1	0	0	1
	372	0	1	14/4/2023	Yes	0.16	0.1	10	-0.06	10	0	0.05	0.07	0.05	4.78	0.02	0	4.73	0	0	0	42	1	0.08	0	1	1	0	0	0	0	0	0
	128	0	1	14/4/2023	Yes	0.11	0.05	3.63	-0.06	3.52	0	0.28	0.04	0.05	2.01	-0.24	-0.23	1.73	0	0	0	60	1	-0.04	0	0	0	0	0	0	0	0	1
	23	0	1	14/4/2023	Yes	0.06	0.05	10	-0.01	10	0	0.05	0.06	0.07	10	0.01	0.02	10	0	0	0	36	1	0.08	0	1	1	0	0	0	0	0	0
	51	0	1	14/4/2023	Yes	0.03	0.03	5.41	0	5.38	0	0.03	0.03	0.03	6.02	0	0	5.99	0	0	0	52	1	0	0	1	1	0	0	0	0	0	1
	265	0	1	14/4/2023	Yes	0.07	0.09	10	0.02	10	0	0.12	0.07	0.06	10	-0.05	-0.06	10	0	0	0	39	1	-0.04	0	1	1	0	0	0	0	0	1
	342	0	1	14/4/2023	Yes	0.11	0.33	10	0.22	10	0	0.07	0.08	0.08	9.43	0.01	0.01	9.36	0	0	0	71	1	-0.15	0	1	0	0	0	0	0	0	0
	499	0	1	14/4/2023	Yes	0.14	0.11	10	-0.03	10	0	0.25	0.14	0.12	10	-0.11	-0.13	10	0	0	0	45	1	-0.07	0	1	1	0	0	0	0	0	1
3HP	403	0	1	14/4/2023	Yes	0.28	0.22	10	-0.06	10	0	0.13	0.12	0.11	10	-0.01	-0.02	10	0	0	0	33	1	8.06	1	1	1	0	0	0	0	0	0
	405	0	1	14/4/2023	Yes	0.09	0.06	10	-0.03	10	0	0.14	0.13	0.08	10	-0.01	-0.06	10	0	0	0	48	1	-0.01	0	0	0	0	0	0	0	0	1
3HP	290	0	1	14/4/2023	Yes	0.34	8.38	10	8.04	10	1	0.48	4.48	4.48	10	4	4	10	1	1	1	50	1	7.69	1	1	0	0	0	0	36	1	1
3HP	314	0	1	14/4/2023	Yes	0.12	4.66	6.74	4.54	6.62	1	0.21	2.08	1.65	5.71	1.87	1.44	5.5	1	1	1	36	1	10	1	1	1	30	1	1	37.5	1	1
	279	0	1	14/4/2023	Yes	0.05	0.39	10	0.34	10	0	0.04	0.16	0.16	10	0.12	0.12	10	0	0	0	42	1	-0.01	0	1	0	0	0	0	0	0	1
3HP	466	0	1	14/4/2023	Yes	0.06	0.49	10	0.43	10	1	0.12	0.57	0.75	10	0.45	0.63	10	1	1	1	39	1	4.5	1	1	0	0	0	0	0	0	0
	246	0	1	14/4/2023	Yes	0.03	0.02	5.74	-0.01	5.71	0	0.03	0.03	0.03	9.48	0	0	9.45	0	0	0	22	1	0	0	1	0	0	0	0	0	0	1
	366	0	1	14/4/2023	Yes	0.23	0.25	10	0.02	10	0	0.12	0.12	0.12	10	0	0	10	0	0	0	43	1	0.06	0	0	0	0	0	0	0	0	0
3HP	539	1	1	14/4/2023	Yes	0.05	0.73	10	0.68	10	1	0.09	0.51	0.37	10	0.42	0.28	10	1	0	1	37	1	0.2	0	1	0	17	1	1	13	1	1
	622	1	1	14/4/2023	Yes	0.04	0.05	6.33	0.01	6.29	0	0.02	0.03	0.03	5.52	0.01	0.01	5.5	0	0	0	46	1	0.01	0	0	0	0	0	0	0	0	0
	612	1	1	14/4/2023	Yes	0.05	0.06	10	0.01	10	0	0.01	0.12	0.06	10	0.11	0.05	10	0	0	0	29	1	0.02	0	0	0	0	0	0	0	0	0
3HP	462	0	1	14/4/2023	Yes	0.3	10	10	9.83	10	1	0.17	10	8.63	10	9.9	8.46	9.86	1	1	1	38	1	10	1	1	0	13	1	1	24	1	1
	368	0	1	14/4/2023	Yes	0.07	0.07	10	0	10	0	0.12	0.11	0.04	10	-0.01	-0.08	10	0	0	0	36	1	0	0	1	0	0	0	0	0	0	0
3HP	503	1	1	14/4/2023	Yes	0.81	10	10	9.66	10	1	0.98	5.23	5.24	10	4.25	4.26	10	1	1	1	33	1	6.02	0	1	1	19	1	1	29	1	0
3HP	560	1	1	14/4/2023	Yes	0.05	1.48	10	1.43	10	1	0.1	0.88	1.32	5.03	0.78	1.22	4.93	1	1	1	33	1	5.36	1	0	0	14	1	1	18.5	1	1
3HP	285	0	1	14/4/2023	Yes	0.11	1.55	10	1.44	10	1	0.08	0.65	0.94	10	0.57	0.86	10	1	1	1	34	1	7.1	1	1	1	0	0	0	17.5	1	0
3HP	369	0	1	14/4/2023	Yes	0.07	4	10	3.93	10	1	0.2	1.99	3.2	10	1.79	3	10	1	1	1	47	1	2.58	1	1	1	16	1	1	0	0	1
	269	0	1	14/4/2023	Yes	0.08	0.1	10	0.02	10	0	0.03	0.05	0.05	10	0.02	0.02	10	0	0	0	39	1	0.01	0	0	0	0	0	0	0	0	1
	347	0	1	14/4/2023	Yes	0.17	0.19	10	0.02	10	0	0.08	0.09	0.11	9.69	0.01	0.03	9.61	0	0	0	48	1	0.01	0	1	0	0	0	0	0	0	0
	189	0	1	14/4/2023	Yes	0.48	0.52	10	0.04	10	0	0.35	0.23	0.19	10	-0.12	-0.16	10	0	0	0	37	1	0	0	1	1	0	0	0	0	0	1
	152	0	1	14/4/2023	Yes	0.05	0.12	10	0.07	10	0	0.02	0.04	0.03	7.19	0.02	0.01	7.17	0	0	0	41	1	0		1	0	0	0	0	0	0	0
	354	0	1	14/4/2023	Yes	3.17	10	10	8.83	9.35	1	4.74	10	10	10	5.71	7.01	7.83	1	1	1	30	1	7.3		0	1	14	1	1	25	1	0
3HP	806	1	1	14/4/2023	Yes	0.11	0.22	10	0.11	10	0	0.05	0.12	0.11	10	0.07	0.06	10	0	0	0	38	1	3.51	1	0	0	0	0	0	0	0	0
Mycobacterium vaccae	300	0	1	14/4/2023	Yes	0.11	4.62	10	4.51	10	1	0.21	3.44	2.59	10	3.23	2.38	10	1	1	1	41	1	10	1	1	0	42.5	1	1	15	1	1
	353	0	1	14/4/2023	Yes	0.07	0.06	10	-0.01	10	0	0.04	0.05	0.05	10	0.01	0.01	10	0	0	0	38	1	-0.02	0	0	1	1	0	0	1	0	1
	438	0	1	14/4/2023	Yes	0.16	0.19	10	0.03	10	0	0.18	0.19	0.16	10	0.01	-0.02	10	0	0	0	31	1	-0.02	0	0	0	1	0	0	1	0	0
	303	0	1	14/4/2023	Yes	0.09	0.22	10	0.13	10	0	0.05	0.08	0.1	10	0.03	0.05	10	0	0	0	51	1	0.02	0	0	0	1	0	0	1	0	1
	483	0	1	14/4/2023	Yes	0.15	0.08	10	-0.07	10	0	0.03	0.05	0.04	10	0.02	0.01	10	0	0	0	30	1	-0.01	0	0	1	0	0	0	0	0	0
	268	0	1	14/4/2023	Yes	0.04	0.04	10	0	10	0	0.08	0.08	0.1	10	0	0.02	10	0	0	0	34	1	0.23	0	1	0	0	0	0	0	0	1
	228	0	1	14/4/2023	Yes	0.06	0.05	10	-0.01	10	0	0.03	0.04	0.04	10	0.01	0.01	10	0	0	0	32	1	-0.03	0	0	0	1	0	0	1	0	1
	242	0	1	14/4/2023	Yes	0.07	0.06	10	-0.01	10	0	0.04	0.04	0.03	9.19	0	-0.01	9.15	0	0	0	57	1	0.02	0	0	1	0	0	0	0	0	1
	157	0	1	14/4/2023	Yes	0.04	0.06	10	0.02	10	0	0.02	0.06	0.27	10	0.04	0.25	10	0	0	0	37	1	-0.02	0	1	1	0	0	0	0	0	1
	585	1	1	14/4/2023	Yes	0.04	0.04	10	0	10	0	0.03	0.02	0.02	10	-0.01	-0.01	10	0	0	0	36	1	0	0	0	1	0	0	0	0	0	0
	304	0	1	14/4/2023	Yes	0.09	0.06	10	-0.03	10	0	0.03	0.05	0.02	10	0.02	-0.01	10	0	0	0	40	1	-0.01	0	0	0	1	0	0	1	0	0
	149	0	1	14/4/2023	Yes	0.05	0.09	0.74	0.04	0.69	0	0.03	0.03	0.04	0.09	0	0.01	0.06	2	2	2	58	1	0.13	0	1	1	0	0	0	0	0	1
	403	0	1	14/4/2023	Yes	0.04	0.04	10	0	10	0	0.02	0.02	0.02	10	0	0	10	0	0	0	32	1	-0.06	0	1	1	0	0	0	0	0	1
Mycobacterium vaccae	408	0	1	14/4/2023	Yes	0.1	1.94	10	1.84	10	1	0.09	1.24	1.16	10	1.15	1.07	10	1	1	1	34	1	10	1	0	1	0	0	0	14	1	1
	399	0	1	14/4/2023	Yes	0.25	0.12	10	-0.13	10	0	0.19	0.1	0.11	10	-0.09	-0.08	10	0	0	0	41	1	0	0	1	0	0	0	0	0	0	1
	527	1	1	14/4/2023	Yes	0.05	0.04	10	-0.01	10	0	0.04	0.02	0.02	5.73	-0.02	-0.02	5.69	0	0	0	47	1	-0.03	0	1	1	0	0	0	0	0	1
	461	0	1	14/4/2023	Yes	0.04	0.29	10	0.25	10	0	0.05	0.27	0.27	10	0.22	0.22	10	0	0	0	30	1	0.02	0	0	0	0	0	0	0	0	1
Mycobacterium vaccae	471	0	1	14/4/2023	Yes	0.04	0.16	10	0.12	10	0	0.03	0.05	0.05	8.08	0.02	0.02	8.05	0	0	0	35	1	10	1	1	1	0	0	0	0	0	0
	28	0	1	14/4/2023	Yes	0.05	0.04	10	-0.01	10	0	0.02	0.09	0.33	4.72	0.07	0.31	4.7	0	0	0	41	1	0.04	0	1	1	0	0	0	0	0	1
	281	0	1	14/4/2023	Yes	0.05	0.04	10	-0.01	10	0	0.03	0.03	0.03	9.97	0	0	9.94	0	0	0	36	1	-0.02	0	1	1	0	0	0	0	0	1
Mycobacterium vaccae	436	0	1	14/4/2023	Yes	0.04	0.05	10	0.01	10	0	0.03	0.03	0.02	6.2	0	-0.01	6.17	0	0	0	46	1	0.03	0	1	1	20	1	1	1	0	0
3HP	254	0	1	14/4/2023	Yes	0.05	0.15	10	0.1	10	0	0.02	0.05	0.07	10	0.03	0.05	10	0	0	0	52	1	0.44	1	1	1	11	1	1	1	0	0
	610	1	1	14/4/2023	Yes	0.06	0.06	10	0	9.98	0	0.03	0.03	0.03	7.94	0	0	7.91	0	0	0	55	1	-0.01	0	1	1	1	0	0	1	0	0
	122	0	1	14/4/2023	Yes	0.11	0.33	8.42	0.22	8.31	0	0.18	0.24	0.25	4.79	0.06	0.07	4.61	0	0	0	60	1	0.33	0	1	1	1	0	0	1	0	0
	685	1	1	14/4/2023	Yes	0.05	0.03	10	-0.02	10	0	0.02	0.03	0.03	10	0.01	0.01	10	0	0	0	50	1	0.01	0	1	1	1	0	0	1	0	0
	285	0	1	14/4/2023	Yes	0.05	0.05	10	0	10	0	0.03	0.03	0.03	10	0	0	10	0	0	0	47	1	0.01	0	0	0	1	0	0	1	0	0
	267	0	1	14/4/2023	Yes	0.06	0.1	10	0.04	10	0	0.05	0.05	0.06	10	0	0.01	10	0	0	0	56	1	0.03	0	1	0	1	0	0	1	0	0
Mycobacterium vaccae	677	1	1	14/4/2023	Yes	0.04	0.15	10	0.11	10	0	0.03	0.35	0.28	10	0.32	0.25	10	0	0	0	41	1	3.32	1	0	1	0	0	0	0	0	1
	213	0	1	14/4/2023	Yes	0.06	0.06	10	0	10	0	0.04	0.03	0.03	10	-0.01	-0.01	10	0	0	0	60	1
	658	1	1	14/4/2023	Yes	0.92	1.76	10	0.84	10	1	0.43	0.56	0.59	6.73	0.13	0.16	6.3	0	0	0	51	1	0.66	0	1	1	1	0	0	1	0	0
	220	0	1	14/4/2023	Yes	0.05	0.37	10	0.32	10	0	0.03	0.03	0.02	1.98	0	-0.01	1.95	0	0	0	33	1	0.02		0	0	1	0	0	1	0	0
3HP	209	0	1	14/4/2023	Yes	0.05	0.33	10	0.28	10	0	0.03	0.35	0.23	10	0.32	0.2	10	0	0	0	41	1
	369	0	1	14/4/2023	Yes	0.05	0.07	10	0.02	10	0	0.04	0.05	0.05	10	0.01	0.01	10	0	0	0	32	1	0.01	0	1	0	1	0	0	1	0	0
	181	0	1	14/4/2023	Yes	0.06	0.07	9.02	0.01	8.96	0	0.05	0.09	0.09	5.09	0.04	0.04	5.04	0	0	0	58	1	-0.02	0	1	0	1	0	0	1	0	0
	422	0	1	14/4/2023	Yes	0.17	0.18	5.11	0.01	4.94	0	0.14	0.15	0.17	4.17	0.01	0.03	4.03	0	0	0	40	1	-0.02	0	1	1	1	0	0	1	0	0
	215	0	1	14/4/2023	Yes	0.29	0.69	10	0.4	10	1	0.25	0.42	1.2	10	0.17	0.95	10	0	1	1	42	1	1.39	1	1	0	20	1	1	1	0	1
	366	0	1	14/4/2023	Yes	0.07	0.07	10	0	10	0	0.04	0.06	0.07	10	0.02	0.03	10	0	0	0	50	1	0.01	0	0	0	1	0	0	1	0	1
	432	0	1	14/4/2023	Yes	0.09	0.08	6.91	-0.01	6.82	0	0.06	0.05	0.06	2.69	-0.01	0	2.63	0	0	0	37	1	0	0	1	0	1	0	0	1	0	0
3HP	401	0	1	14/4/2023	Yes	0.18	2.59	10	2.41	10	1	0.25	3.08	5.85	10	2.83	5.6	10	1	1	1	49	1	8.67	1	1	1	1	0	0	12.5	1	0
3HP	183	0	1	14/4/2023	Yes	0.37	3.28	10	2.91	10	1	0.61	5.71	5.38	10	5.1	4.77	10	1	1	1	50	1	7.88	1	1	1	0	0	0	60	1	1
3HP	342	0	1	14/4/2023	Yes	0.05	0.26	8.24	0.21	8.19	0	0.03	0.1	0.17	9.1	0.07	0.14	9.07	0	0	0	38	1	6.9	1	1	1	0	0	0	0	0	1
	277	0	1	14/4/2023	Yes	0.06	0.16	4.68	0.1	4.62	0	0.05	0.11	0.1	4.23	0.06	0.05	4.18	0	0	0	35	1	-0.02	0	0	0	0	0	0	0	0	0
3HP	324	0	1	14/4/2023	Yes	0.02	4.49	6.82	4.47	6.8	1	0.03	0.88	1.21	10	0.85	1.18	10	1	1	1	30	1	10	1	0	0	47.5	1	1	47.5	1	1
	168	0	1	14/4/2023	Yes	0.04	0.05	0.71	0.01	0.67	0	0.04	0.03	0.03	0.63	-0.01	-0.01	0.59	0	0	0	41	1	0		0	0	0	0	0	0	0	0
3HP	439	0	1	14/4/2023	Yes	0.07	0.05	4.52	-0.02	4.45	0	0.05	0.05	0.05	8.55	0	0	8.5	0	0	0	36	0	0.01	0	1	0	7	1	0	1	0	1
Mycobacterium vaccae	115	0	1	14/4/2023	Yes	0.05	1.98	4.88	1.93	4.83	1	0.09	1.87	1.78	2.18	1.78	1.69	2.09	1	1	1	49	0	2.29	1	1	0	2	0	0	1	0	1
	254	0	1	14/4/2023	Yes	0.03	2.44	7.87	2.41	7.84	1	0.07	0.04	0.07	8.44	-0.03	0	8.37	0	0	0	40	0	0.01	0	1	1	4	0	0	2	0	1
3HP	506	1	1	14/4/2023	Yes	0.04	5.07	7.93	5.03	7.89	1	0.08	0.74	2.77	10	0.66	2.69	10	1	1	1	49	0	10	1	1	0	11.5	1	1	37.5	1	1
	237	0	1	14/4/2023	Yes	0.14	0.19	0.13	0.05	-0.01	2	0.06	0.06	0.07	0.07	0	0.01	0.01	2	2	2	44	0
	544	1	1	14/4/2023	Yes	0.15	0.05	7.38	-0.1	7.23	0	0.06	0.05	0.03	10	-0.01	-0.03	10	0	0	0	46	0
	305	0	1	14/4/2023	Yes	0.03	0.81	10	0.78	10	1	0.06	0.78	0.56	10	0.72	0.5	10	1	1	1	46	1	7.41	1	1	1	0	0	0	35	1	1
	523	1	1	14/4/2023	Yes	0.03	0.03	3.87	0	3.84	0	0.03	0.04	0.04	3.21	0.01	0.01	3.18	0	0	0	32	0	0.02	0	1	1	2.5	0	0	2	0	1
3HP	344	0	1	14/4/2023	Yes	0.03	0.92	10	0.89	10	1	0.05	0.54	0.44	10	0.49	0.39	10	1	1	1	51	0
	471	0	1	14/4/2023	Yes	0.07	0.16	3.76	0.09	3.69	0	0.07	0.08	0.11	1.74	0.01	0.04	1.67	0	0	0	38	0	0.01	0	1	0	1	0	0	1	0	1
3HP	38	0	1	14/4/2023	Yes	0.02	2.04	4.34	2.02	4.32	1	0.08	1.77	0.96	10	1.69	0.88	10	1	1	1	54	0	8.9	1	1	0	6	1	0	45	1	1
	435	0	1	14/4/2023	Yes	0.05	0.07	8.36	0.02	8.31	0	0.06	0.05	0.06	10	-0.01	0	10	0	0	0	40	0	0.01	0	0	0	1	0	0	1	0	0
	269	0	1	14/4/2023	Yes	0.08	3.91	7.48	3.83	7.4	1	0.08	5.39	5.08	10	5.31	5	10	1	1	1	35	0	10	1	1	0	16.5	1	1	50	1	1
	328	0	1	14/4/2023	Yes	0.09	0.08	7.26	-0.01	7.17	0	0.08	0.07	0.1	10	-0.01	0.02	10	0	0	0	52	0	0.03	0	1	0	1	0	0	1	0	1
	584	1	1	14/4/2023	Yes	0.02	0.03	8.77	0.01	8.75	0	0.02	0.02	0.02	10	0	0	10	0	0	0	34	0	0	0	1	0	1	0	0	1	0	1
	312	0	1	14/4/2023	Yes	0.14	0.18	4.47	0.04	4.33	0	0.03	0.04	0.04	9.17	0.01	0.01	9.14	0	0	0	52	0
	163	0	1	14/4/2023	Yes	0.1	0.03	5.9	-0.07	5.8	0	0.07	0.02	0.02	9.41	-0.05	-0.05	9.34	0	0	0	52	0	0.02	0	1	0	3	0	0	1	0	1
	598	1	1	14/4/2023	Yes	0.1	0.05	10	-0.05	10	0	0.1	0.12	0.11	10	0.02	0.01	10	0	0	0	36	1	-0.01	0	1	1	0	0	0	0	0	1
	499	0	1	14/4/2023	Yes	0.03	0.05	8.64	0.02	8.61	0	0.03	0.02	0.02	10	-0.01	-0.01	10	0	0	0	31	0	-0.01	0	1	1	1	0	0	1	0	0
	525	1	1	14/4/2023	Yes	0.03	0.04	5.68	0.01	5.65	0	0.04	0.05	0.05	4.14	0.01	0.01	4.1	0	0	0	60	0	0.29	0	0	0	1	0	0	2	0	0
Mycobacterium vaccae	511	1	1	14/4/2023	Yes	0.09	2.6	9.66	2.51	9.57	1	0.17	0.43	1.06	10	0.26	0.89	10	0	1	1	43	0	10	1	1	0	17.5	1	1	13	1	1
	397	0	1	14/4/2023	Yes	0.05	0.03	5.82	-0.02	5.77	0	0.03	0.03	0.03	5.4	0	0	5.37	0	0	0	42	0
3HP	517	1	1	14/4/2023	Yes	0.03	2.94	8.2	2.91	8.17	1	0.03	2.65	3.26	10	2.62	3.23	10	1	1	1	42	0	10	1	1	0	12.5	1	1	55	1	0
	638	1	1	14/4/2023	Yes	0.03	0.03	7.81	0	7.78	0	0.02	0.02	0.02	10	0	0	10	0	0	0	34	0	0	0	1	1	2	0	0	2	0	1
3HP	334	0	1	14/4/2023	Yes	0.02	0.03	8.01	0.01	7.99	0	0.02	0.03	0.05	10	0.01	0.03	10	0	0	0	42	0	0.01	0	1	1	12	1	1	2	0	0
	331	0	1	14/4/2023	Yes	0.03	0.03	9.26	0	9.23	0	0.02	0.03	0.02	10	0.01	0	10	0	0	0	39	0	0.05	0	1	0	2	0	0	2	0	1
3HP	298	0	1	14/4/2023	Yes	0.02	2.15	8.16	2.13	8.14	1	0.04	1.52	1.87	10	1.48	1.83	10	1	1	1	46	0
	217	0	1	14/4/2023	Yes	0.05	0.04	7.94	-0.01	7.89	0	0.03	0.03	0.06	10	0	0.03	10	0	0	0	37	0	0.01	0	1	0	1	0	0	1	0	0
	466	0	1	14/4/2023	Yes	0.02	0.81	10	0.79	10	1	0.06	0.92	0.73	10	0.86	0.67	10	1	1	1	42	1	10	1	1	1	0	0	0	0	0	0
3HP	373	0	1	14/4/2023	Yes	0.13	1.16	5.74	1.03	5.61	1	0.06	0.99	1.1	10	0.93	1.04	10	1	1	1	46	0
	248	0	1	14/4/2023	Yes	0.23	3.5	3.77	3.27	3.54	1	0.05	2.46	5.17	10	2.41	5.12	10	1	1	1	40	0	10	1	1	0	20	1	1	20	1	0
	587	1	1	14/4/2023	Yes	0.04	0.04	6.66	0	6.62	0	0.03	0.03	0.04	10	0	0.01	10	0	0	0	35	0	0.01	0	1	1	2	0	0	1	0	0
	236	0	1	14/4/2023	Yes	0.02	0.06	5.88	0.04	5.86	0	0.02	0.12	0.52	7.58	0.1	0.5	7.56	0	1	1	38	1	0.21	0	1	0	0	0	0	0	0	0
Mycobacterium vaccae	559	1	1	14/4/2023	Yes	0.04	1.08	10	1.04	10	1	0.1	1.11	1.23	10	1.01	1.13	10	1	1	1	56	1	6.75	1	1	1	0	0	0	0	0	0
Mycobacterium vaccae	833	1	1	14/4/2023	Yes	0.02	2.07	10	2.05	10	1	0.33	1.97	2.33	10	1.64	2	10	1	1	1	56	1	3.3	1	1	1	0	0	0	0	0	1
3HP	399	0	1	14/4/2023	Yes	0.05	0.23	7.88	0.18	7.83	0	0.08	0.16	0.17	10	0.08	0.09	10	0	0	0	40	1	10	1	1	1	0	0	0	0	0	0
3HP	569	1	1	14/4/2023	Yes	0.35	2.73	10	2.38	10	1	2.54	3.32	3.09	10	0.78	0.55	7.61	1	1	1	46	1	5.77	1	1	1	10.5	1	1	67.5	1	0
	235	0	1	14/4/2023	Yes	0.04	0.04	10	0	10	0	0.09	0.04	0.05	10	-0.05	-0.04	10	0	0	0	53	1	0.01	0	1	0	0	0	0	0	0	1
	244	0	1	14/4/2023	Yes	0.02	0.03	10	0.01	10	0	0.03	0.05	0.05	10	0.02	0.02	10	0	0	0	55	1	0.01	0	1	1	1	0	0	1	0	0
	181	0	1	14/4/2023	Yes	0.03	0.03	3.71	0	3.68	0	0.03	0.05	0.05	5.55	0.02	0.02	5.52	0	0	0	45	1	-0.04	0	1	0	0	0	0	0	0	0
	235	0	1	14/4/2023	Yes	0.06	0.06	10	0	10	0	0.06	0.11	0.1	10	0.05	0.04	10	0	0	0	35	1	0	0	1	0	0	0	0	0	0	0
	344	0	1	14/4/2023	Yes	0.03	0.03	10	0	10	0	0.03	0.03	0.04	8.59	0	0.01	8.56	0	0	0	46	1	0.01	0	1	1	0	0	0	0	0	0
	357	0	1	14/4/2023	Yes	0.05	0.06	10	0.01	10	0	0.05	0.08	0.09	10	0.03	0.04	10	0	0	0	36	1	0.05	0	1	1	0	0	0	0	0	0
	161	0	1	14/4/2023	Yes	0.05	0.06	7.66	0.01	7.61	0	0.05	0.08	0.08	10	0.03	0.03	10	0	0	0	51	1	0.13	0	1	0	0	0	0	0	0	1
	258	0	1	14/4/2023	Yes	0.02	0.02	6.56	0	6.54	0	0.04	0.03	0.05	10	-0.01	0.01	10	0	0	0	32	1	0.01	0	0	1	0	0	0	0	0	1
	295	0	1	14/4/2023	Yes	0.06	0.04	10	-0.02	10	0	0.06	0.05	0.08	10	-0.01	0.02	10	0	0	0	48	1	0.08	0	1	1	0	0	0	0	0	1
	331	0	1	14/4/2023	Yes	0.02	0.02	10	0	10	0	0.03	0.03	0.03	10	0	0	10	0	0	0	51	1	-0.09	0	0	1	0	0	0	0	0	1
	364	0	1	14/4/2023	Yes	0.04	0.04	3.62	0	3.58	0	0.04	0.07	0.05	3.62	0.03	0.01	3.58	0	0	0	61	1	0	0	1	1	0	0	0	0	0	0
	528	1	1	14/4/2023	Yes	0.03	0.03	8.53	0	8.5	0	0.04	0.04	0.04	10	0	0	10	0	0	0	47	1	0.01	0	0	0	0	0	0	0	0	1
	737	1	1	14/4/2023	Yes	0.02	0.02	10	0	10	0	0.03	0.03	0.04	10	0	0.01	10	0	0	0	53	1	0.02	0	1	0	1	0	0	1	0	1
	538	1	1	14/4/2023	Yes	0.03	0.02	10	-0.01	10	0	0.03	0.06	0.04	10	0.03	0.01	10	0	0	0	37	1	-0.05	0	1	1	0	0	0	0	0	0
	379	0	1	14/4/2023	Yes	0.02	0.06	10	0.04	10	0	0.04	0.04	0.04	10	0	0	10	0	0	0	39	1	0.02	0	1	1	0	0	0	0	0	0
	479	0	1	14/4/2023	Yes	0.05	0.41	9.96	0.36	9.91	1	0	0.77	0.8	9.14	0.77	0.8	9.14	1	1	1	36	1	10	1	1	1	17.5	1	1	20	1	0
	451	0	1	14/4/2023	Yes	0.04	0.03	10	-0.01	10	0	0.04	0.05	0.04	10	0.01	0	10	0	0	0	45	1	-0.01	0	0	0	0	0	0	0	0	1
	146	0	1	14/4/2023	Yes	0.05	0.04	10	-0.01	10	0	0.04	0.06	0.05	10	0.02	0.01	10	0	0	0	30	1	-0.11	0	1	1	0	0	0	0	0	0
	500	1	1	14/4/2023	Yes	0.05	0.04	10	-0.01	10	0	0.07	0.04	0.09	10	-0.03	0.02	10	0	0	0	48	1	-0.01	0	1	1	0	0	0	0	0	0
3HP	358	0	1	14/4/2023	Yes	0.03	1.14	6.72	1.11	6.69	1	0.03	0.97	1.09	5.02	0.94	1.06	4.99	1	1	1	44	1	0.39	1	1	1	0	0	0	0	0	0
	724	1	1	14/4/2023	Yes	0.04	0.04	8.98	0	8.94	0	0.05	0.05	0.04	7.47	0	-0.01	7.42	0	0	0	50	1	-0.02	0	1	1	0	0	0	0	0	1
	468	0	1	14/4/2023	Yes	0.02	0.02	10	0	10	0	0.03	0.03	0.04	10	0	0.01	10	0	0	0	36	1	0	0	0	0	0	0	0	0	0	0
	312	0	1	14/4/2023	Yes	0.03	0.04	10	0.01	10	0	0.04	0.04	0.05	10	0	0.01	10	0	0	0	55	1	0.01	0	1	1	0	0	0	0	0	0
	742	1	1	14/4/2023	Yes	0.02	0.02	10	0	10	0	0.01	0.02	0.03	10	0.01	0.02	10	0	0	0	41	1	0.02	0	1	1	0	0	0	0	0	1
3HP	402	0	1	14/4/2023	Yes	0.04	0.14	10	0.1	10	0	0.05	0.14	0.13	10	0.09	0.08	10	0	0	0	45	1	1.97	1	1	1	0	0	0	0	0	0
	671	1	1	14/4/2023	Yes	0.04	0.04	10	0	10	0	0.04	0.05	0.05	10	0.01	0.01	10	0	0	0	33	1	-0.05	0	1	1	0	0	0	0	0	0
	499	0	1	14/4/2023	Yes	0.03	0.03	10	0	10	0	0.03	0.04	0.04	5.15	0.01	0.01	5.12	0	0	0	34	1	0	0	1	1	0	0	0	0	0	1
3HP	355	0	1	14/4/2023	Yes	0.22	8.36	10	8.14	10	1	1.05	9.18	7.51	10	8.13	6.46	10	1	1	1	50	1			0	0	10	1	1	27.5	1	0
	392	0	1	14/4/2023	Yes	0.04	0.04	10	0	10	0	0.06	0.07	0.07	10	0.01	0.01	10	0	0	0	27	1	0	0	1	0	0	0	0	0	0	0
	344	0	1	14/4/2023	Yes	0.02	0.02	8.39	0	8.37	0	0.03	0.03	0.03	10	0	0	10	0	0	0	27	1	-0.01	0	0	0	0	0	0	0	0	0
	541	1	1	14/4/2023	Yes	0.06	0.06	6.32	0	6.26	0	0.05	0.1	0.06	5.73	0.05	0.01	5.68	0	0	0	34	1	-0.01	0	1	1	0	0	0	0	0	0
	116	0	1	14/4/2023	Yes	0.07	0.07	10	0	10	0	0.08	0.08	0.07	10	0	-0.01	10	0	0	0	53	1	0.11	0	1	0	0	0	0	0	0	0
	456	0	1	14/4/2023	Yes	0.03	0.03	10	0	10	0	0.04	0.04	0.05	10	0	0.01	10	0	0	0	34	1	-0.07	0	1	1	0	0	0	0	0	1
	389	0	1	14/4/2023	Yes	0.03	0.02	10	-0.01	10	0	0.03	0.03	0.03	10	0	0	10	0	0	0	39	1	0	0	1	1	0	0	0	0	0	0
	391	0	1	14/4/2023	Yes	0.03	0.02	10	-0.01	10	0	0.03	0.03	0.04	10	0	0.01	10	0	0	0	38	1	-0.01	0	1	1	0	0	0	0	0	1
3HP	142	0	1	14/4/2023	Yes	0.05	0.22	10	0.17	10	0	0.08	0.3	0.25	8.49	0.22	0.17	8.41	0	0	0	39	1	0.29	0	1	1	10	1	1	0	0	1
	602	1	1	14/4/2023	Yes	0.14	0.12	10	-0.02	10	0	0.12	0.13	0.09	10	0.01	-0.03	10	0	0	0	31	1	0	0	1	1	0	0	0	0	0	0
Mycobacterium vaccae	512	1	1	14/4/2023	Yes	0.08	2.31	10	2.23	10	1	0.07	0.92	1.08	10	0.85	1.01	10	1	1	1	37	1	10	1	0	0	30	1	1	47.5	1	1
	401	0	1	14/4/2023	Yes	0.05	0.03	10	-0.02	10	0	0.04	0.04	0.04	10	0	0	10	0	0	0	36	1	0.01	0	1	1	0	0	0	0	0	0
3HP	662	1	1	14/4/2023	Yes	0.01	2.99	10	2.98	10	1	0.05	5.38	5.46	10	5.33	5.41	10	1	1	1	43	1			1	1	0	0	0	36.5	1	1
	419	0	1	14/4/2023	Yes	0.06	0.06	10	0	10	0	0.06	0.08	0.06	10	0.02	0	10	0	0	0	28	1	0.02	0	1	1	0	0	0	0	0	1
3HP	506	1	1	14/4/2023	Yes	0.22	0.6	10	0.38	10	1	0.05	0.4	0.6	7.59	0.35	0.55	7.54	1	1	1	30	1	10	1	1	1	0	0	0	0	0	0
	707	1	1	14/4/2023	Yes	0.06	0.04	6.04	-0.02	5.98	0	0.04	0.04	0.04	4.65	0	0	4.61	0	0	0	21	1	-0.15	0	0	0	0	0	0	0	0	0
	292	0	1	14/4/2023	Yes	0.06	0.09	10	0.03	10	0	0.06	0.08	0.08	10	0.02	0.02	10	0	0	0	27	1	0.03	0	1	1	0	0	0	0	0	0
	830	1	1	14/4/2023	Yes	0.05	0.05	3.64	0	3.59	0	0.06	0.04	0.04	2.07	-0.02	-0.02	2.01	0	0	0	33	1	-0.03	0	0	0	0	0	0	0	0	0
Mycobacterium vaccae	344	0	1	14/4/2023	Yes	0.04	0.04	10	0	10	0	0.04	0.05	0.04	10	0.01	0	10	0	0	0	34	1	0.96	1	1	1	0	0	0	0	0	1
	364	0	1	14/4/2023	Yes	0.03	0.07	10	0.04	10	0	0.04	0.07	0.13	10	0.03	0.09	10	0	0	0	36	1	0.01	1	1	0	0	0	0	0	0	0
3HP	531	1	1	14/4/2023	Yes	0.06	3.65	10	3.59	10	1	0.07	0.87	1.07	10	0.8	1	10	1	1	1	33	1
	792	1	1	14/4/2023	Yes	0.04	0.03	5.37	-0.01	5.33	0	0.05	0.05	0.05	0.86	0	0	0.81	0	0	0	40	1	0	0	1	1	0	0	0	0	0	1
	575	1	1	14/4/2023	Yes	0.03	0.03	10	0	10	0	0.03	0.04	0.03	10	0.01	0	10	0	0	0	35	1	0.01	0	0	0	0	0	0	0	0	0
	357	0	1	14/4/2023	Yes	0.11	1.81	10	1.7	10	1	0.11	2.26	3.47	10	2.15	3.36	10	1	1	1	39	1	-0.77	0	1	0	0	0	0	0	0	0
	500	1	1	14/4/2023	Yes	0.04	0.03	8.41	-0.01	8.37	0	0.04	0.03	0.04	10	-0.01	0	10	0	0	0	46	1	-0.07	0	0	0	0	0	0	0	0	1
3HP	533	1	1	14/4/2023	Yes	0.04	0.05	3.51	0.01	3.47	0	0.05	0.05	0.07	3.58	0	0.02	3.53	0	0	0	54	1	0.01	0	1	0	13.5	1	1	0	0	1
	313	0	1	14/4/2023	Yes	0.11	0.08	10	-0.03	10	0	0.07	0.08	0.08	10	0.01	0.01	10	0	0	0	33	1	-0.06	0	0	0	0	0	0	0	0	0
3HP	385	0	1	14/4/2023	Yes	0.05	4.45	10	4.4	10	1	0.54	5.55	4.29	10	5.01	3.75	10	1	1	1	49	1	7.92	1	1	1	42.5	1	1	42.5	1	0
	653	1	1	14/4/2023	Yes	0.03	0.04	10	0.01	10	0	0.04	0.04	0.03	10	0	-0.01	10	0	0	0	39	1	-0.05	0	0	0	0	0	0	0	0	0
	630	1	1	14/4/2023	Yes	0.27	0.32	10	0.05	10	0	0.27	0.33	0.34	10	0.06	0.07	10	0	0	0	26	1	-0.02	0	1	1	0	0	0	0	0	1
3HP	242	0	1	14/4/2023	Yes	0.04	0.95	10	0.91	10	1	0.04	0.29	6.01	10	0.25	5.97	10	0	1	1	46	1	1.81	1	1	1	22.5	1	1	30	1	1
	250	0	1	14/4/2023	Yes	0.03	0.03	6.05	0	6.02	0	0.04	0.04	0.04	7.36	0	0	7.32	0	0	0	34	1	-0.01	0	1	1	0	0	0	0	0	0
	350	0	1	14/4/2023	Yes	0.06	6.81	10	6.75	10	1	0.4	4.97	10	10	4.57	10	10	1	1	1	55	1
3HP	757	1	1	14/4/2023	Yes	0.03	0.12	10	0.09	10	0	0.04	0.09	0.13	10	0.05	0.09	10	0	0	0	36	1	0.45	1	1	1	0	0	0	0	0	0
	261	0	1	14/4/2023	Yes	0.07	0.57	10	0.5	10	1	0.18	0.59	0.68	10	0.41	0.5	10	1	1	1	40	1	0.64	1	1	1	10	1	1	0	0	1
3HP	477	0	1	14/4/2023	Yes	0.04	0.14	10	0.1	10	0	0.05	0.13	0.08	10	0.08	0.03	10	0	0	0	50	1	2.57	1	1	1	0	0	0	0	0	0
	624	1	1	14/4/2023	Yes	0.08	0.07	10	-0.01	10	0	0.08	0.09	0.08	10	0.01	0	10	0	0	0	50	1	-0.02	0	1	1	0	0	0	0	0	0
	433	0	1	14/4/2023	Yes	0.05	8.13	10	8.08	10	1	0.09	10	10	7.6	10	10	7.51	1	1	1	42	1	-0.02	0	1	0	0	0	0	0	0	0
	570	1	1	14/4/2023	Yes	0.03	0.03	10	0	10	0	0.03	0.04	0.05	10	0.01	0.02	10	0	0	0	40	1	0	0	1	1	0	0	0	0	0	0
3HP	433	0	1	14/4/2023	Yes	0.09	3.01	10	2.92	10	1	0.07	0.64	0.84	10	0.57	0.77	10	1	1	1	34	1	10	1	0	0	20	1	1	15	1	0
	243	0	1	14/4/2023	Yes	0.04	0.03	10	-0.01	10	0	0.04	0.04	0.04	10	0	0	10	0	0	0	32	1	0.01	0	1	1	0	0	0	0	0	1
	241	0	1	14/4/2023	Yes	0.07	3.48	7.51	3.41	7.44	1	0.18	4.75	5.28	4.42	4.57	5.1	4.24	1	1	1	54	1	-0.11	0	1	1	0	0	0	0	0	0
3HP	405	0	1	14/4/2023	Yes	0.08	2.89	10	2.81	10	1	0.1	2.24	1.96	10	2.14	1.86	10	1	1	1	44	1
	235	0	1	14/4/2023	Yes	0.08	0.05	10	-0.03	10	0	0.05	0.06	0.07	7.81	0.01	0.02	7.76	0	0	0	47	1	-0.04	0	1	0	0	0	0	0	0	0
	236	0	1	14/4/2023	Yes	0.06	0.08	10	0.02	10	0	0.06	0.08	0.06	10	0.02	0	10	0	0	0	53	1	0.03	0	1	0	0	0	0	0	0	0
	634	1	1	14/4/2023	Yes	7.31	0.05	10	-7.26	5.21	0	0.04	0.05	0.06	10	0.01	0.02	10	0	0	0	56	1	0.02	0	0	0	0	0	0	0	0	0
	163	0	1	14/4/2023	Yes	0.07	0.07	10	0	10	0	0.1	0.09	0.08	10	-0.01	-0.02	10	0	0	0	39	1	-0.02	0	0	0	1	0	0	1	0	0
	200	0	1	14/4/2023	Yes	0.03	0.04	10	0.01	10	0	0.04	0.05	0.06	10	0.01	0.02	10	0	0	0	24	1	0.01	0	1	1	1	0	0	1	0	1
	165	0	1	14/4/2023	Yes	0.05	0.05	10	0	10	0	0.05	0.06	0.05	10	0.01	0	10	0	0	0	29	1	0	0	1	1	1	0	0	1	0	0
	1160	1	1	14/4/2023	Yes	0.06	0.06	10	0	10	0	0.09	0.1	0.11	10	0.01	0.02	10	0	0	0	41	1
3HP	395	0	1	14/4/2023	Yes	0.06	2.45	10	2.39	10	1	0.08	2.42	2.61	10	2.34	2.53	10	1	1	1	50	1
