# Supplementary material for: Performance comparison of QuantiFERON-TB Gold In-Tube and QuantiFERON-TB Gold Plus in detecting Mycobacterium tuberculosis infection among HIV patients in China
Source: PeerJ. 2025 Mar 31;13:e19195. doi: 10.7717/peerj.19195 (PMC11967438; doi:10.7717/peerj.19195)
Supplement: Supplemental Information 3 [file peerj-13-19195-s003.xlsx]

## Sheet: Sheet1
0:No, 1: Yes	0:No, 1: Yes	0:No, 1: Yes	0:No, 1: Yes	0:No, 1: Yes	0:Female, 1: Male	0:No, 1: Yes	0:No, 1: Yes	0:No, 1: Yes	0:No, 1: Yes	0:No, 1: Yes	0:No, 1: Yes	0:No, 1: Yes
CD4≥500	3Result	result of TB1	result of TB2	Result of QFT-Plus	Sex	result of QFT	smoking	drinking	TST≥5	TST≥10	result of EC	BCG
0	0	0	0	0	1	1	1	1	0	0	0	0
1	0	0	0	0	1	0	1	1	0	0	0	0
0	0	0	0	0	1	0	0	1	0	0	0	1
0	0	0	0	0	1	1	1	1	0	0	0	0
0	0	0	0	0	1	0	0	1	0	0	0	0
0	0	0	0	0	1	0	1	1	0	0	0	1
0	0	0	0	0	1	0	1	1	0	0	0	1
0	1	1	1	1	1	1	1	1	1	1	1	0
0	0	0	0	0	1	0	0	1	0	0	0	0
0	0	0	0	0	1	0	1	1	0	0	0	0
1	0	0	0	0	1	0	1	1	1	1	0	0
0	0	0	0	0	1	0	1	0	0	0	0	0
1	0	0	0	0	1	0	1	1	0	0	0	1
1	0	0	0	0	1	0	0	0	0	0	0	1
0	0	0	0	0	1	0	1	1	0	0	0	1
0	0	0	0	0	1
1	1	1	1	1	1	1	1	0	1	1	1	1
1	0	0	0	0	1	0	1	1	0	0	0	0
0	0	0	0	0	1	0	0	0	0	0	0	1
0	0	0	0	0	1	0	1	1	0	0	0	1
1	0	0	0	0	1	0	1	1	0	0	0	1
0	0	0	0	0	1	0	1	1	0	0	0	1
0	0	0	0	0	1	0	0	1	0	0	0	1
0	0	0	0	0	1	0	0	1	0	0	0	0
0	0	0	0	0	1	0	0	0	0	0	0	1
0	0	0	0	0	1	0	1	1	0	0	0	0
0	0	0	0	0	1	0	1	1	0	0	0	1
0	0	0	0	0	1	0	1	1	0	0	0	0
0	1	1	1	1	1
1	0	0	0	0	1
0	0	0	0	0	1	0	0	1	1	1	0	0
0	0	0	0	0	1	0	1	1	0	0	0	1
0	1	1	1	1	1	1	0	1	0	0	1	1
1	0	0	0	0	1	0	0	1	0	0	0	1
0	0	0	0	0	1	0	1	1	0	0	0	1
0	0	0	0	0	1	0	1	1	0	0	0	1
0	1	1	1	1	1
0	0	0	0	0	1	0	1	0	0	0	0	0
0	0	0	0	0	1	0	1	0	0	0	0	0
0	0	0	0	0	1	0	1	0	0	0	0	1
0	0	0	0	0	1	1	1	1	0	0	0	1
0	1	1	1	1	1	1	1	0	1	0	0	0
0	1	1	1	1	1	0	1	1	1	1	0	1
0	0	0	0	0	1	0	1	1	0	0	0	0
0	0	0	0	0	1	0	0	0	0	0	0	1
0	0	0	0	0	1	0	1	1	0	0	0	0
0	0	0	0	0	1	0	1	1	0	0	0	1
0	0	0	0	0	1	0	1	1	0	0	0	1
0	0	0	0	0	1	0	1	0	0	0	0	0
0	0	0	0	0	1	0	1	1	0	0	0	1
0	0	0	0	0	1	1	1	1	0	0	0	0
0	0	0	0	0	1	0	0	0	0	0	0	1
0	1	1	1	1	1	1	1	0	0	0	1	1
0	1	1	1	1	1	1	1	1	1	1	1	1
0	0	0	0	0	1	0	1	0	0	0	0	1
0	1	1	1	1	1	1	1	0	0	0	0	0
0	0	0	0	0	1	0	1	0	0	0	0	1
0	0	0	0	0	1	0	0	0	0	0	0	0
1	1	1	0	1	1	0	1	0	1	1	1	1
1	0	0	0	0	1	0	0	0	0	0	0	0
1	0	0	0	0	1	0	0	0	0	0	0	0
0	1	1	1	1	1	1	1	0	1	1	1	1
0	0	0	0	0	1	0	1	0	0	0	0	0
1	1	1	1	1	1	0	1	1	1	1	1	0
1	1	1	1	1	1	1	0	0	1	1	1	1
0	1	1	1	1	1	1	1	1	0	0	1	0
0	1	1	1	1	1	1	1	1	1	1	0	1
0	0	0	0	0	1	0	0	0	0	0	0	1
0	0	0	0	0	1	0	1	0	0	0	0	0
0	0	0	0	0	1	0	1	1	0	0	0	1
0	0	0	0	0	1		1	0	0	0	0	0
0	1	1	1	1	1		0	1	1	1	1	0
1	0	0	0	0	1	1	0	0	0	0	0	0
0	1	1	1	1	1	1	1	0	1	1	1	1
0	0	0	0	0	1	0	0	1	0	0	0	1
0	0	0	0	0	1	0	0	0	0	0	0	0
0	0	0	0	0	1	0	0	0	0	0	0	1
0	0	0	0	0	1	0	0	1	0	0	0	0
0	0	0	0	0	1	0	1	0	0	0	0	1
0	0	0	0	0	1	0	0	0	0	0	0	1
0	0	0	0	0	1	0	0	1	0	0	0	1
0	0	0	0	0	1	0	1	1	0	0	0	1
1	0	0	0	0	1	0	0	1	0	0	0	0
0	0	0	0	0	1	0	0	0	0	0	0	0
0	0	2	2	2	1	0	1	1	0	0	0	1
0	0	0	0	0	1	0	1	1	0	0	0	1
0	1	1	1	1	1	1	0	1	0	0	1	1
0	0	0	0	0	1	0	1	0	0	0	0	1
1	0	0	0	0	1	0	1	1	0	0	0	1
0	0	0	0	0	1	0	0	0	0	0	0	1
0	0	0	0	0	1	1	1	1	0	0	0	0
0	0	0	0	0	1	0	1	1	0	0	0	1
0	0	0	0	0	1	0	1	1	0	0	0	1
0	0	0	0	0	1	0	1	1	1	1	0	0
0	0	0	0	0	1	1	1	1	1	1	0	0
1	0	0	0	0	1	0	1	1	0	0	0	0
0	0	0	0	0	1	0	1	1	0	0	0	0
1	0	0	0	0	1	0	1	1	0	0	0	0
0	0	0	0	0	1	0	0	0	0	0	0	0
0	0	0	0	0	1	0	1	0	0	0	0	0
1	0	0	0	0	1	1	0	1	0	0	0	1
0	0	0	0	0	1
1	1	0	0	0	1	0	1	1	0	0	0	0
0	0	0	0	0	1		0	0	0	0	0	0
0	0	0	0	0	1
0	0	0	0	0	1	0	1	0	0	0	0	0
0	0	0	0	0	1	0	1	0	0	0	0	0
0	0	0	0	0	1	0	1	1	0	0	0	0
0	1	0	1	1	1	1	1	0	1	1	0	1
0	0	0	0	0	1	0	0	0	0	0	0	1
0	0	0	0	0	1	0	1	0	0	0	0	0
0	1	1	1	1	1	1	1	1	0	0	1	0
0	1	1	1	1	1	1	1	1	0	0	1	1
0	0	0	0	0	1	1	1	1	0	0	0	1
0	0	0	0	0	1	0	0	0	0	0	0	0
0	1	1	1	1	1	1	0	0	1	1	1	1
0	0	0	0	0	1		0	0	0	0	0	0
0	0	0	0	0	0	0	1	0	1	0	0	1
0	1	1	1	1	0	1	1	0	0	0	0	1
0	1	0	0	0	0	0	1	1	0	0	0	1
1	1	1	1	1	0	1	1	0	1	1	1	1
0	2	2	2	2	0
1	0	0	0	0	0
0	1	1	1	1	1	1	1	1	0	0	1	1
1	0	0	0	0	0	0	1	1	0	0	0	1
0	1	1	1	1	0
0	0	0	0	0	0	0	1	0	0	0	0	1
0	1	1	1	1	0	1	1	0	1	0	1	1
0	0	0	0	0	0	0	0	0	0	0	0	0
0	1	1	1	1	0	1	1	0	1	1	1	1
0	0	0	0	0	0	0	1	0	0	0	0	1
1	0	0	0	0	0	0	1	0	0	0	0	1
0	0	0	0	0	0
0	0	0	0	0	0	0	1	0	0	0	0	1
1	0	0	0	0	1	0	1	1	0	0	0	1
0	0	0	0	0	0	0	1	1	0	0	0	0
1	0	0	0	0	0	0	0	0	0	0	0	0
1	1	0	1	1	0	1	1	0	1	1	1	1
0	0	0	0	0	0
1	1	1	1	1	0	1	1	0	1	1	1	0
1	0	0	0	0	0	0	1	1	0	0	0	1
0	0	0	0	0	0	0	1	1	1	1	0	0
0	0	0	0	0	0	0	1	0	0	0	0	1
0	1	1	1	1	0
0	0	0	0	0	0	0	1	0	0	0	0	0
0	1	1	1	1	1	1	1	1	0	0	0	0
0	1	1	1	1	0
0	1	1	1	1	0	1	1	0	1	1	1	0
1	0	0	0	0	0	0	1	1	0	0	0	0
0	0	0	1	1	1	0	1	0	0	0	0	0
1	1	1	1	1	1	1	1	1	0	0	0	0
1	1	1	1	1	1	1	1	1	0	0	0	1
0	0	0	0	0	1	1	1	1	0	0	0	0
1	1	1	1	1	1	1	1	1	1	1	1	0
0	0	0	0	0	1	0	1	0	0	0	0	1
0	0	0	0	0	1	0	1	1	0	0	0	0
0	0	0	0	0	1	0	1	0	0	0	0	0
0	0	0	0	0	1	0	1	0	0	0	0	0
0	0	0	0	0	1	0	1	1	0	0	0	0
0	0	0	0	0	1	0	1	1	0	0	0	0
0	0	0	0	0	1	0	1	0	0	0	0	1
0	0	0	0	0	1	0	0	1	0	0	0	1
0	0	0	0	0	1	0	1	1	0	0	0	1
0	0	0	0	0	1	0	0	1	0	0	0	1
0	0	0	0	0	1	0	1	1	0	0	0	0
1	0	0	0	0	1	0	0	0	0	0	0	1
1	0	0	0	0	1	0	1	0	0	0	0	1
1	0	0	0	0	1	0	1	1	0	0	0	0
0	0	0	0	0	1	0	1	1	0	0	0	0
0	1	1	1	1	1	1	1	1	1	1	1	0
0	0	0	0	0	1	0	0	0	0	0	0	1
0	0	0	0	0	1	0	1	1	0	0	0	0
1	0	0	0	0	1	0	1	1	0	0	0	0
0	1	1	1	1	1	1	1	1	0	0	0	0
1	0	0	0	0	1	0	1	1	0	0	0	1
0	0	0	0	0	1	0	0	0	0	0	0	0
0	0	0	0	0	1	0	1	1	0	0	0	0
1	0	0	0	0	1	0	1	1	0	0	0	1
0	0	0	0	0	1	1	1	1	0	0	0	0
1	0	0	0	0	1	0	1	1	0	0	0	0
0	0	0	0	0	1	0	1	1	0	0	0	1
0	1	1	1	1	1		0	0	1	1	1	0
0	0	0	0	0	1	0	1	0	0	0	0	0
0	0	0	0	0	1	0	0	0	0	0	0	0
1	0	0	0	0	1	0	1	1	0	0	0	0
0	0	0	0	0	1	0	1	0	0	0	0	0
0	0	0	0	0	1	0	1	1	0	0	0	1
0	0	0	0	0	1	0	1	1	0	0	0	0
0	0	0	0	0	1	0	1	1	0	0	0	1
0	0	0	0	0	1	0	1	1	1	1	0	1
1	0	0	0	0	1	0	1	1	0	0	0	0
1	1	1	1	1	1	1	0	0	1	1	1	1
0	0	0	0	0	1	0	1	1	0	0	0	0
1	1	1	1	1	1		1	1	0	0	1	1
0	0	0	0	0	1	0	1	1	0	0	0	1
1	1	1	1	1	1	1	1	1	0	0	0	0
1	0	0	0	0	1	0	0	0	0	0	0	0
0	0	0	0	0	1	0	1	1	0	0	0	0
1	0	0	0	0	1	0	0	0	0	0	0	0
0	0	0	0	0	1	1	1	1	0	0	0	1
0	0	0	0	0	1	1	1	0	0	0	0	0
1	1	1	1	1	1
1	0	0	0	0	1	0	1	1	0	0	0	1
1	0	0	0	0	1	0	0	0	0	0	0	0
0	1	1	1	1	1	0	1	0	0	0	0	0
1	0	0	0	0	1	0	0	0	0	0	0	1
1	0	0	0	0	1	0	1	0	1	1	0	1
0	0	0	0	0	1	0	0	0	0	0	0	0
0	1	1	1	1	1	1	1	1	1	1	1	0
1	0	0	0	0	1	0	0	0	0	0	0	0
1	0	0	0	0	1	0	1	1	0	0	0	1
0	1	0	1	1	1	1	1	1	1	1	1	1
0	0	0	0	0	1	0	1	1	0	0	0	0
0	1	1	1	1	1
1	0	0	0	0	1	1	1	1	0	0	0	0
0	1	1	1	1	1	1	1	1	1	1	0	1
0	0	0	0	0	1	1	1	1	0	0	0	0
1	0	0	0	0	1	0	1	1	0	0	0	0
0	1	1	1	1	1	0	1	0	0	0	0	0
1	0	0	0	0	1	0	1	1	0	0	0	0
0	1	1	1	1	1	1	0	0	1	1	1	0
0	0	0	0	0	1	0	1	1	0	0	0	1
0	1	1	1	1	1	0	1	1	0	0	0	0
0	1	1	1	1	1
0	0	0	0	0	1	0	1	0	0	0	0	0
0	0	0	0	0	1	0	1	0	0	0	0	0
1	0	0	0	0	1	0	0	0	0	0	0	0
0	0	0	0	0	1	0	0	0	0	0	0	0
0	0	0	0	0	1	0	1	1	0	0	0	1
0	0	0	0	0	1	0	1	1	0	0	0	0
1	0	0	0	0	1
0	1	1	1	1	1
